# Supplementary material for: Blue organic light-emitting diodes realizing external quantum efficiency over 25% using thermally activated delayed fluorescence emitters
Source: PubMed Central journal article supplement (PMC5428273; doi:10.1038/s41598-017-00368-5), 2017-03-21
Supplement: 41598_2017_368_MOESM1_ESM.pdf [file 41598_2017_368_MOESM1_ESM.pdf]

**Supplementary Information for:**  
**Blue organic light-emitting diodes realizing external quantum efficiency over 25% using thermally activated delayed fluorescence emitters**

Takuya Miwa<sup>1</sup>, Shosei Kubo<sup>1</sup>, Katsuyuki Shizu<sup>1</sup>, Takeshi Komino<sup>2</sup>, Chihaya Adachi<sup>2,3</sup>,  
Hironori Kaji<sup>1,3\*</sup>

<sup>1</sup> Institute for Chemical Research, Kyoto University, Uji, Kyoto 611-0011, Japan

<sup>2</sup> Center for Organic Photonics and Electronics Research (OPERA), Kyushu University,  
744 Motoooka, Nishi, Fukuoka 819-0395, Japan

<sup>3</sup> JST, ERATO, Adachi Molecular Exciton Engineering Project

\* kaji@scl.kyoto-u.ac.jp

## **Contents**

- 1. Synthesis and characterization (Figure S1, S2)**
- 2. OLED performances (Figure S3, S4)**
- 3. Optical simulations (Figure S5)**
- 4. Photophysical properties (Figure S6, S7, Table S1, S2)**

# 1. Synthesis and characterization

## General procedures

Reactions were performed under an Ar atmosphere. Column chromatography was performed with PSQ 60B silica (Fuji Silysia).  $^1\text{H}$  NMR and  $^{13}\text{C}$  NMR spectra were recorded with the Bruker Avance III 800-MHz spectrometer (800 MHz for  $^1\text{H}$  and 201 MHz for  $^{13}\text{C}$  NMR measurements). Chemical shifts are reported in  $\delta$  ppm, determined against the signal from residual protons in the deuterated solvents for  $^1\text{H}$  NMR experiments and solvent peaks for  $^{13}\text{C}$  NMR spectra as internal standards. Atmospheric pressure chemical ionization (APCI) mass spectra were measured with a Bruker micrOTOF-Q II (Bruker, Germany). Spectral grade solvents and starting materials were purchased from commercial sources and used without further purification. Respective donor and acceptor units of CCX-I and CCX-II were synthesized following previously reported procedures.<sup>1,2</sup> PPF was also synthesized following previously reported procedures.<sup>3</sup> CCX-I, CCX-II and PPF were used after temperature-gradients sublimation.

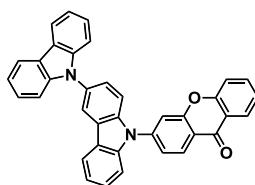

**CCX-I**

9*H*-3,9'-bicarbazole (BCZ) was prepared according to the method reported in Ref.

1. 3-bromo-9*H*-xanthen-9-one (BXTN) was prepared according to the method reported in Ref. 2. A mixture of BCZ (359 mg, 1.08 mmol), BXTN (297 mg, 1.08 mmol), Pd<sub>2</sub>(dba)<sub>3</sub>·CHCl<sub>3</sub> (23.3 mg, 0.0225 mmol), XPhos (40.6 mg, 0.0852 mmol) and *t*-BuONa (158 mg, 1.64 mmol) in toluene (9 mL) was stirred under reflux for 12 h. After cooling to room temperature, the reaction mixture was extracted with CHCl<sub>3</sub>. The organic layer was washed with H<sub>2</sub>O and then dried over anhydrous MgSO<sub>4</sub>. After filtration and evaporation, the crude product was purified flash chromatography (silica gel, eluent: CHCl<sub>3</sub>) and recrystallized from toluene to provide CCX-I as a yellow-green solid (429 mg, yield: 76.4%). <sup>1</sup>H NMR (800 MHz, CDCl<sub>3</sub>): δ (ppm) 8.64 (d, *J* = 8.2 Hz, 1H), 8.43 (dd, *J* = 7.9 Hz, 1.7 Hz, 1H), 8.32 (d, *J* = 2.1 Hz, 1H), 8.20 Hz (d, *J* = 8.2 Hz, 2H), 8.14 (d, *J* = 8.2 Hz, 1H), 7.87 (d, *J* = 1.4 Hz, 1H), 7.80 (m, 2H), 7.76 (dd, *J* = 8.2 Hz, 2.1 Hz, 1H), 7.67 (d, *J* = 8.2 Hz, 1H), 7.62 (dd, *J* = 8.2 Hz, 2.1 Hz, 1H), 7.57 (d, *J* = 8.2 Hz, 1H), 7.54 (dt, *J* = 8.2 Hz, 6.9 Hz, 1.4 Hz, 1H), 7.47 (dt, *J* = 8.2 Hz, 6.9 Hz, 1.4 Hz, 1H), 7.43 (m, 4H), 7.39 (t, *J* = 6.9 Hz, 1H), 7.31 (ddd, 7.7 Hz, 6.0 Hz, 2.1 Hz, 2H); <sup>13</sup>C NMR (201 MHz, CDCl<sub>3</sub>): δ (ppm) 176.39, 157.22, 156.32, 143.43, 141.75, 140.74, 139.11, 135.15, 130.91, 128.91, 127.13, 126.89, 125.92, 125.89, 125.20, 124.44, 123.61, 123.20, 122.17, 122.02, 121.40, 120.83, 120.67, 120.33, 119.74, 119.67, 118.01, 115.28, 111.04, 110.23, 109.73; APCI-MS (*m/z*): [M+H]<sup>+</sup> calcd. for C<sub>37</sub>H<sub>23</sub>N<sub>2</sub>O<sub>2</sub>, 527.1760; found, 527.1991; Elemental analysis calcd. (%) for C<sub>37</sub>H<sub>22</sub>N<sub>2</sub>O<sub>2</sub>: C, 84.39; H, 4.21; N, 5.32; found: C, 84.65; H, 4.24; N, 5.29.

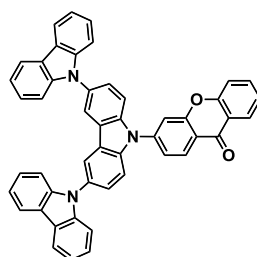

### CCX-II

9'*H*-9,3':6',9''-tercarbazole (TCZ) was prepared according to the method reported in Ref. 1. A mixture of TCZ (1.00 g, 2.02 mmol), BXTN (553 mg, 2.01 mmol), Pd<sub>2</sub>(dba)<sub>3</sub>·CHCl<sub>3</sub> (41.6 mg, 0.0402 mmol), XPhos (76.6 mg, 0.161 mmol) and *t*-BuONa (290 mg, 3.02 mmol) in toluene (20 mL) was stirred under reflux for 23 h. After cooling to room temperature, the reaction mixture was extracted with CHCl<sub>3</sub>. The organic layer was washed with H<sub>2</sub>O and then dried over anhydrous MgSO<sub>4</sub>. After filtration and evaporation, the crude product was purified flash chromatography (silica gel, eluent: CHCl<sub>3</sub>) and recrystallized from toluene to provide CCX-II as a yellow-green solid (1.39 g, yield: 99.7%). <sup>1</sup>H NMR (800 MHz, CDCl<sub>3</sub>): δ (ppm) 8.70 (d, 8.9 Hz, 1H), 8.44 (dd, *J* = 8.2 Hz, 2.1 Hz, 1H), 8.31 (d, *J* = 2.1 Hz, 2H), 8.17 (d, 8.2 Hz, 4H), 7.95 (d, 2.1 Hz, 1H), 7.86 (d, *J* = 8.9 Hz, 4H), 7.84 (dd, *J* = 8.2 Hz, 2.1 Hz, 2H), 7.69 (dd, *J* = 8.6 Hz, 1.7 Hz, 1H), 7.59 (d, *J* = 7.6 Hz, 1H), 7.49 (t, *J* = 8.2 Hz, 1H), 7.41 (m, 8H), 7.30 (m, 4H). <sup>13</sup>C NMR (201 MHz, CDCl<sub>3</sub>): δ (ppm) 176.45, 157.37, 156.42, 143.14, 141.73, 139.88, 135.37, 131.44, 129.27, 127.03, 126.74, 126.07, 124.82, 124.64, 123.34, 122.27, 122.11, 121.08, 120.47, 120.01, 119.95, 118.14, 115.57, 114.54, 109.71. APCI-MS (*m/z*): [M]<sup>-</sup> calcd. for C<sub>36</sub>H<sub>24</sub>N<sub>3</sub>, 691.2260; found, 691.2464; Elemental analysis calcd. (%) for C<sub>49</sub>H<sub>29</sub>N<sub>3</sub>O<sub>2</sub>: C, 85.07; H, 4.23; N, 6.07; found: C, 85.03; H, 4.24; N, 6.05.



c

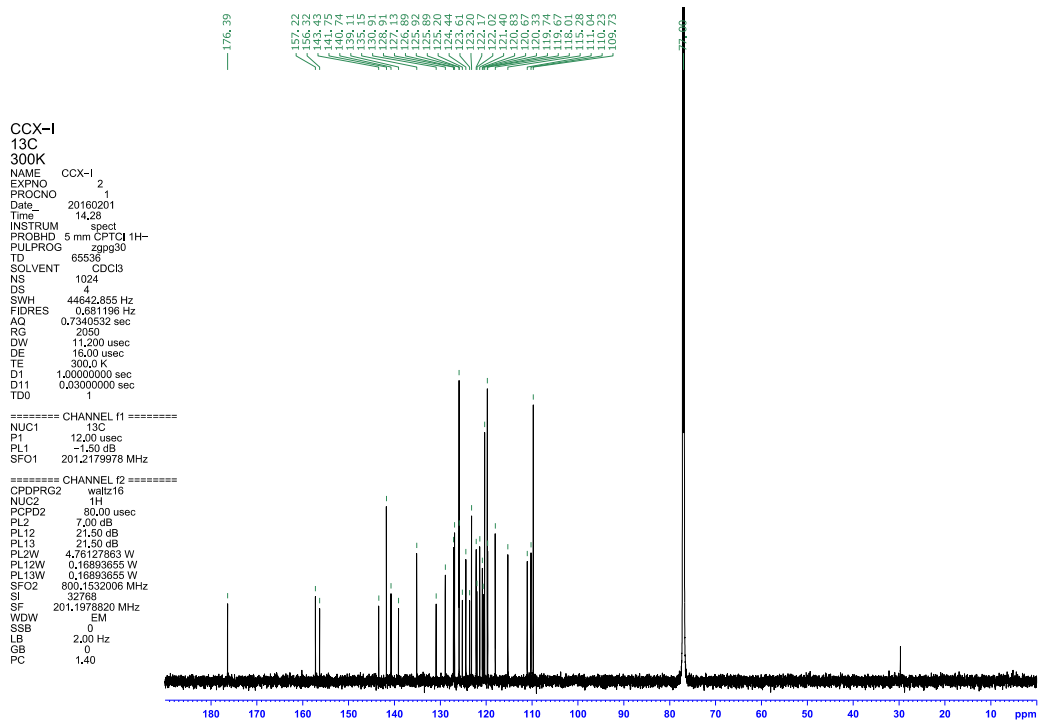

Figure S1 | (contd.)

**a**

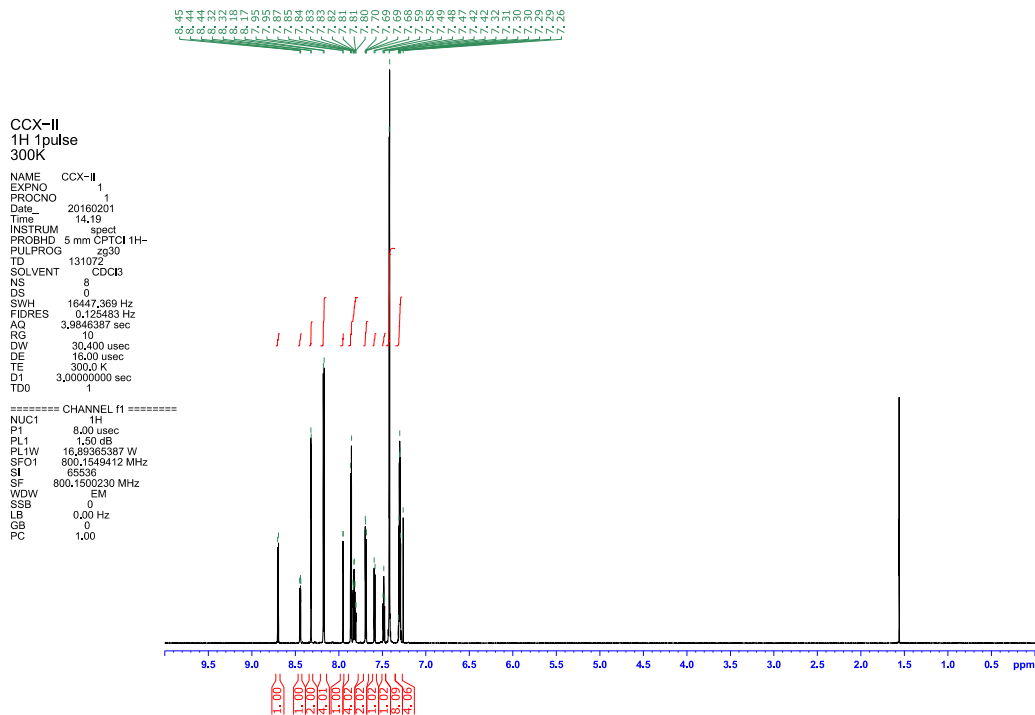

**b**

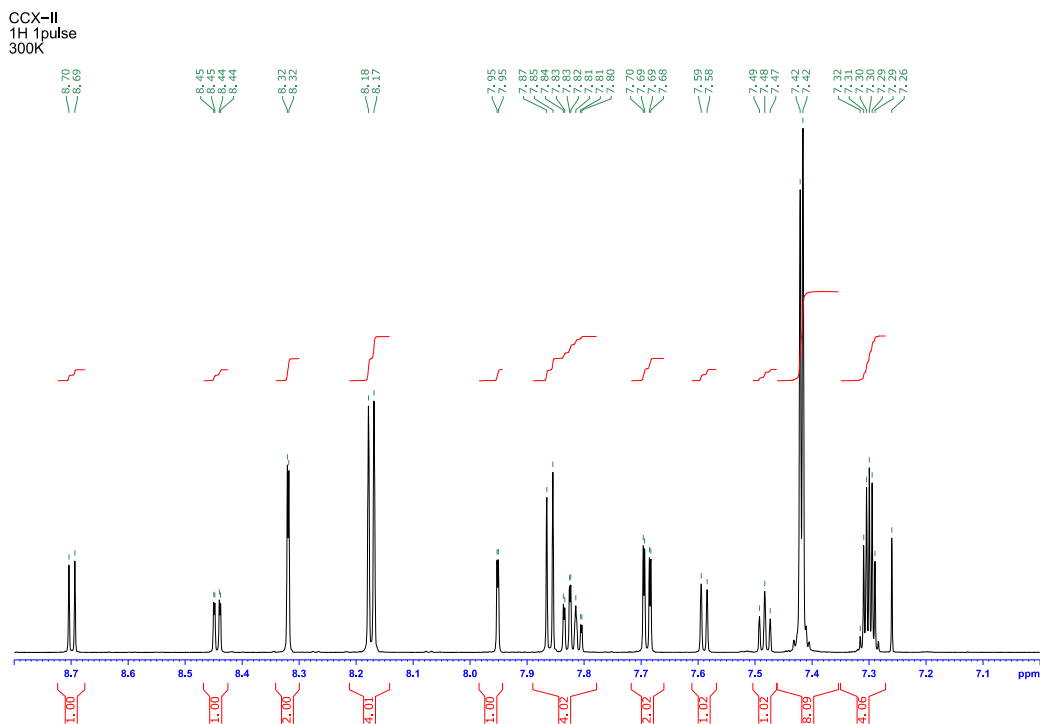

**Figure S2 | NMR spectra of CCX-II in CDCl<sub>3</sub>.** a) <sup>1</sup>H NMR spectrum. b) Enlarged view of the region 7.0–9.0 ppm. c) <sup>13</sup>C NMR spectrum.



c

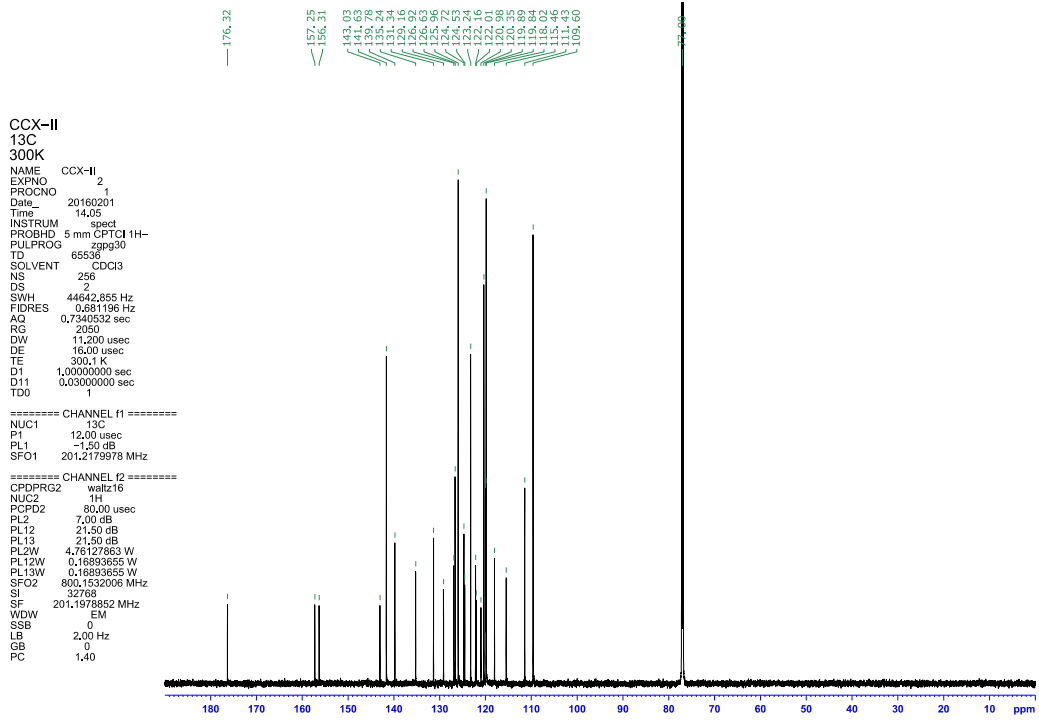

Figure S2 | (contd.)

## 2. OLED performance

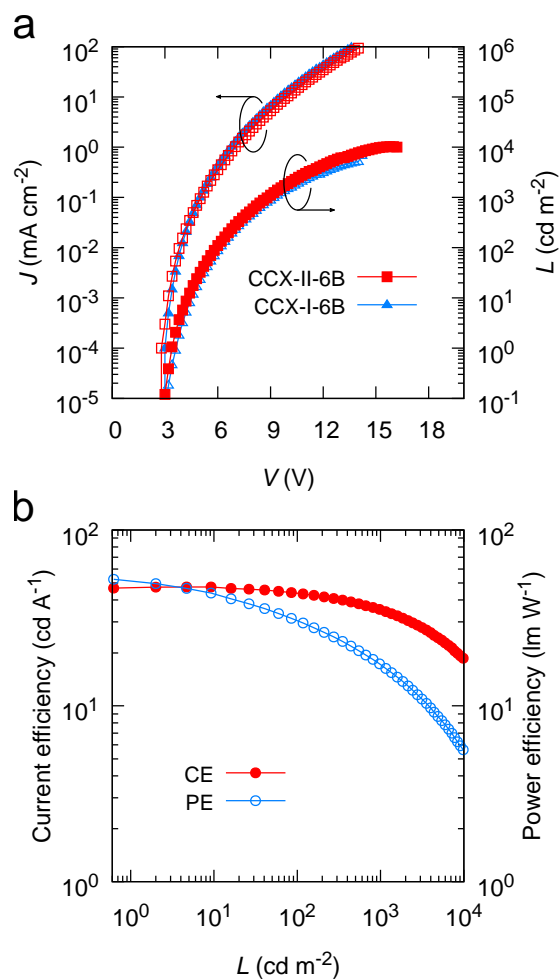

**Figure S3** | a)  $J$ - $V$ - $L$  characteristics for CCX-I-6B and CCX-II-6B devices. b) Current efficiency (CE) and power efficiency (PE) for CCX-II-15B device.

### 3. Optical simulations

Optical simulations were performed with an opto-electrical device simulator Setfos (Fluxim AG). The optical model used in the simulations featured a glass substrate (0.7 mm) / ITO (50 nm) / TAPC ( $x$  nm) / CDBP (10 nm) / emissive layer (EML, 20 nm) / PPF (10 nm) / BmPyPhB ( $y$  nm) / Al (80 nm), where  $x$  and  $y$  are the thicknesses of the hole-transport layer (TAPC) and the electron-transport layer (BmPyPhB), respectively. In the simulations, the emissive dipoles were assumed to be localized in the interface between the CDBP layer and EML.

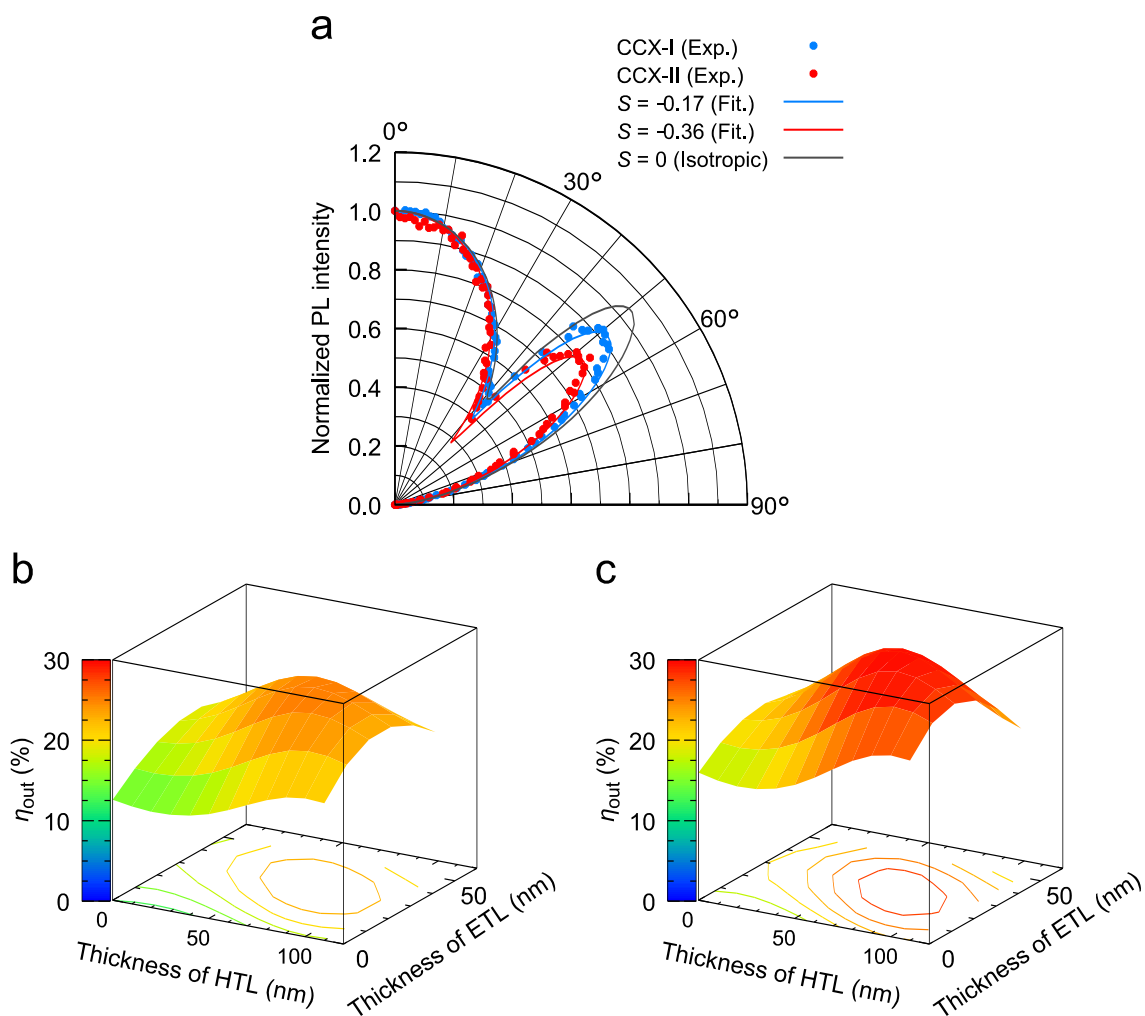

**Figure S4** | a) Angular-dependent p-polarized PL intensities for 6 wt% CCX-I: and CCX-II:PPF films. b) and c), Dependence of  $\eta_{out}$  on the thicknesses of the hole-transport layer (HTL) and electron-transport layer (ETL) for CCX-I-6B (b) and CCX-II-6B (c) devices.

## 4. Photophysical properties

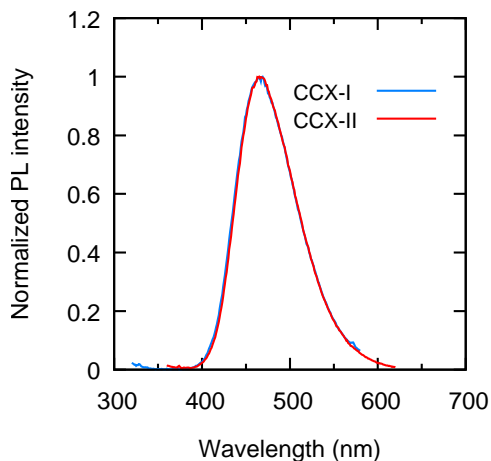

**Figure S5** | PL spectra of 6 wt% CCX-I: and CCX-II:PPF films.

### Calculation of $k_p$ , $k_d$ , $k_{ISC}$ , and $k_{RISC}$

From  $\tau_p$ ,  $\tau_d$ ,  $\Phi_{total}$ ,  $\Phi_p$  and  $\Phi_d$ , we calculated  $k_p$ ,  $k_d$ ,  $k_{ISC}$ , and  $k_{RISC}$  as previously reported,<sup>4</sup> where  $\tau_p$  and  $\tau_d$  are the prompt and delayed fluorescent lifetimes, respectively.  $\Phi_{total}$ ,  $\Phi_p$  and  $\Phi_d$  are the PLQY of the total, and prompt and delayed components, respectively.  $k_p$ ,  $k_d$ ,  $k_{ISC}$ , and  $k_{RISC}$  are the rate constants for prompt fluorescence, TADF, ISC, and RISC, respectively. The temperature dependences of the lifetimes, PLQYs and rate constants for 6 wt% CCX-I: and CCX-II:PPF systems are shown in Table S1 and Table S2.

**Table S1** | Temperature dependences of lifetimes, PLQYs and rate constants for the 6 wt% CCX-I:PPF system.

| Temp. (K) | $\tau_p$ (ns) | $\tau_d$ ( $\mu$ s) | $\Phi_{total}$ (%) | $\Phi_p$ (%) | $\Phi_d$ (%) | $k_p$ ( $\times 10^7$ s $^{-1}$ ) | $k_d$ ( $\times 10^3$ s $^{-1}$ ) | $k_{ISC}$ ( $\times 10^7$ s $^{-1}$ ) | $k_{RISC}$ ( $\times 10^3$ s $^{-1}$ ) |
|-----------|---------------|---------------------|--------------------|--------------|--------------|-----------------------------------|-----------------------------------|---------------------------------------|----------------------------------------|
| 200       | 8.32          | 24.9                | 89.1               | 76.7         | 12.5         | 9.22                              | 4.99                              | 1.28                                  | 5.81                                   |
| 220       | 8.29          | 18.0                | 101.8              | 89.1         | 12.7         | 10.7                              | 7.14                              | 1.34                                  | 8.15                                   |
| 240       | 8.10          | 15.2                | 83.5               | 72.4         | 11.1         | 8.95                              | 7.34                              | 1.19                                  | 8.47                                   |
| 260       | 7.98          | 14.5                | 98.9               | 82.3         | 16.9         | 10.3                              | 11.6                              | 1.74                                  | 14.0                                   |
| 280       | 7.82          | 14.5                | 93.4               | 73.6         | 19.8         | 9.41                              | 13.7                              | 1.99                                  | 17.4                                   |
| 298       | 7.77          | 12.2                | 88.6               | 67.7         | 20.9         | 8.71                              | 17.2                              | 2.06                                  | 22.5                                   |

**Table S2** | Temperature dependences of lifetimes, PLQYs and rate constants for the 6 wt% CCX-II:PPF system.

| Temp. (K) | $\tau_p$ (ns) | $\tau_d$ ( $\mu$ s) | $\Phi_{total}$ (%) | $\Phi_p$ (%) | $\Phi_d$ (%) | $k_p$ ( $\times 10^8$ s $^{-1}$ ) | $k_d$ ( $\times 10^4$ s $^{-1}$ ) | $k_{ISC}$ ( $\times 10^7$ s $^{-1}$ ) | $k_{RISC}$ ( $\times 10^4$ s $^{-1}$ ) |
|-----------|---------------|---------------------|--------------------|--------------|--------------|-----------------------------------|-----------------------------------|---------------------------------------|----------------------------------------|
| 200       | 7.30          | 15.2                | 95.3               | 86.9         | 8.3          | 1.37                              | 6.69                              | 1.79                                  | 7.73                                   |
| 220       | 7.35          | 15.6                | 96.6               | 85.5         | 11.2         | 1.36                              | 6.52                              | 1.97                                  | 7.66                                   |
| 240       | 7.18          | 14.0                | 95.9               | 83.8         | 12.1         | 1.39                              | 7.35                              | 2.26                                  | 8.82                                   |
| 260       | 7.15          | 13.2                | 95.9               | 81.1         | 14.7         | 1.40                              | 7.95                              | 2.64                                  | 9.86                                   |
| 280       | 6.82          | 10.5                | 95.2               | 79.2         | 16.1         | 1.47                              | 9.53                              | 3.05                                  | 12.0                                   |
| 298       | 6.82          | 9.66                | 96.8               | 77.0         | 19.8         | 1.47                              | 10.5                              | 3.37                                  | 13.6                                   |

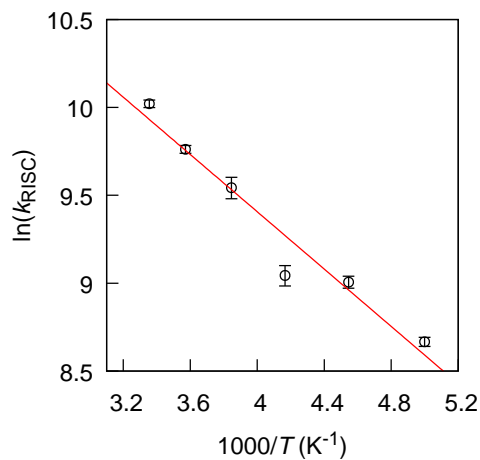

**Figure S6** | Arrhenius plot of the rate constant of RISC for the 6 wt% CCX-I:PPF system.

## References

- 1 Hu, D. *et al.* Separation of electrical and optical energy gaps for constructing bipolar organic wide bandgap materials. *Chem. Commun.* **48**, 3015-3017 (2012).
- 2 Nakanotani, H. *et al.* High-efficiency organic light-emitting diodes with fluorescent emitters. *Nat. Commun.* **5** (2014).
- 3 Vecchi, P. A., Padmaperuma, A. B., Qiao, H., Sapochak, L. S. & Burrows, P. E. A dibenzofuran-based host material for blue electrophosphorescence. *Org. Lett.* **8**, 4211-4214 (2006).
- 4 Tao, Y. *et al.* Thermally activated delayed fluorescence materials towards the breakthrough of organoelectronics. *Adv. Mater.* **26**, 7931-7958 (2014).
